# Supplementary material for: Weaning and Extubation Assisted with Conversational Hypnosis : A Systematic Review
Source: Research Square preprint supplement (doi:10.21203/rs.3.rs-273882/v3), 2021-07-06
Supplement: Supplementary file 1 [file 6c9d5b44fab37eb20e130940.docx]

**Appendix 1 – Search Strategy**

Medline

| ID | topic | Query |
| --- | --- | --- |
| #1 | Population - Weaning | (“ventilator weaning” OR “weaning, ventilator” OR “respirator weaning” OR “weaning, respirator” OR “mechanical ventilator weaning” OR “ventilator weaning, mechanical” OR “weaning, mechanical ventilator”) |
| #2 | Population - Extubation | (“airway extubation” OR “airway extubations” OR “extubation, airway” OR “extubations, airway” OR “Tracheal Extubation” OR “extubation, tracheal” OR “extubations, tracheal” OR “tracheal extubations” OR “extubation, intratracheal” OR “extubations, intratracheal” OR “intratracheal extubation” OR “intratracheal extubations” OR “endotracheal extubation” OR “endotracheal extubations” OR “extubation, endotracheal” OR “extubations, endotracheal”) |
| #3 | Intervention | (hypnosis OR hypnoses OR hypnotism OR hypnotherapy OR hypnotherapies OR mesmerism) |
| #4 | Final query | (#1 OR # 2) AND #3 |

Cochrane Central Registrer of Controlled Trials

| ID | topic | Query |
| --- | --- | --- |
| #1 | Population - Weaning | All Text=("Ventilator Weaning" OR "Ventilator Weaning, Mechanical" OR "Respirator Weaning" OR "Mechanical Ventilator Weaning" OR "Weaning, Respirator" OR "Weaning, Ventilator" OR "Weaning, Mechanical Ventilator") |
| #2 | Population - Extubation | All Text=("Airway Extubation" OR "Airway Extubations" OR "Extubations, Airway" OR "Extubation, Airway" OR "Intratracheal Extubation" OR "Extubations, Endotracheal" OR "Endotracheal Extubations" OR "Extubation, Tracheal" OR "Tracheal Extubations" OR "Extubations, Intratracheal" OR "Extubations, Tracheal" OR "Intratracheal Extubations" OR "Tracheal Extubation" OR "Extubation, Intratracheal" OR "Extubation, Endotracheal" OR "Endotracheal Extubation") |
| #3 | Intervention | All Text=(Hypnosis OR Hypnoses OR Hypnotism OR Hypnotherapies OR Hypnotherapy OR Mesmerism) |
| #4 | Final query | (#1 OR # 2) AND #3 |

Web of Science

| ID | topic | Query |
| --- | --- | --- |
| #1 | Population - Weaning | TS=(“ventilator weaning” OR “weaning, ventilator” OR “respirator weaning” OR “weaning, respirator” OR “mechanical ventilator weaning” OR “ventilator weaning, mechanical” OR “weaning, mechanical ventilator”) |
| #2 | Population - Extubation | TS=(“airway extubation” OR “airway extubations” OR “extubation, airway” OR “extubations, airway” OR “Tracheal Extubation” OR “extubation, tracheal” OR “extubations, tracheal” OR “tracheal extubations” OR “extubation, intratracheal” OR “extubations, intratracheal” OR “intratracheal extubation” OR “intratracheal extubations” OR “endotracheal extubation” OR “endotracheal extubations” OR “extubation, endotracheal” OR “extubations, endotracheal”) |
| #3 | Intervention | TS=(hypnosis OR hypnoses OR hypnotism OR hypnotherapy OR hypnotherapies OR mesmerism) |
| #4 | Final query | (#1 OR # 2) AND #3 |
